# Supplementary material for: Clinical review: Respiratory monitoring in the ICU - a consensus of 16
Source: Springer Nature journal article supplement (doi:10.1186/cc11146), 2012-01-01

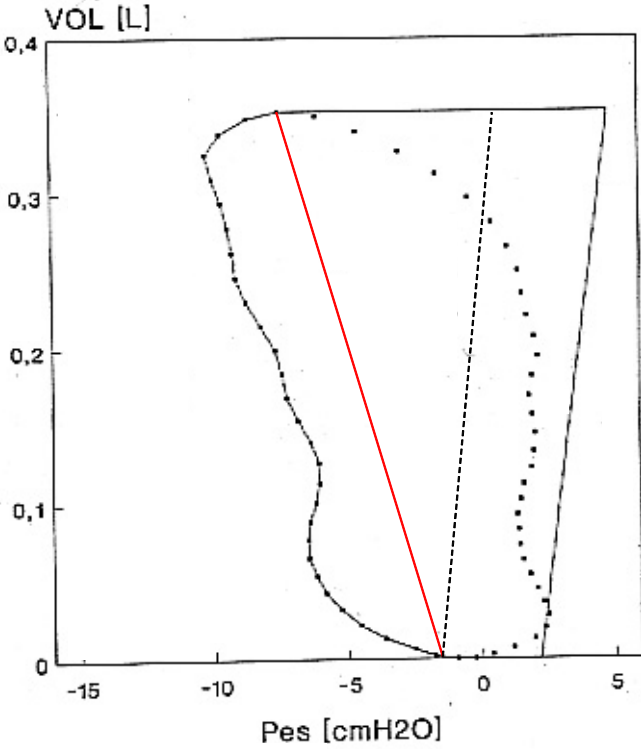

Supplement: 13054_2012_508_MOESM6_ESM.pdf [file 13054_2012_508_MOESM6_ESM.pdf]
